# Supplementary material
Source: publisher figshare collection journal article supplement (https://tandf.figshare.com/articles/dataset/_/21829557)
Supplement: Supplementary file 1 [file 1]

## **Изучение физических и психологических последствий ДТП для пострадавших с увечьями средней тяжести (UQ SuPPORT): выбор подхода и методы**

Justin Alistair Kenardy

### **Аннотация**

**История вопроса:** До настоящего момента исследования влияния психического здоровья на физическое выздоровление после ДТП были основаны на анализе пострадавших с серьезными увечьями. Исследование проведенное UQ SuPPORT ставило своей целью изучить физические и психологические нарушения у пострадавших с незначительными травмами, следуя общему закону об обязательном страховании.

**Цели:** Данная статья представляет собой каркас исследования, служащий платформой для будущих публикаций.

**Методы:** Было проведено двухгодичное лонгитюдное исследование пострадавших в ДТП спустя 6, 12 и 24 месяца после травматического события. Нами использовались следующие методики: DSM-IV CIDI для PTSD, GAD, MDE, Panic Attacks, Agoraphobia. Уровень качества жизни измерялся с помощью SF-36v2, зависимость от алкоголя – AUDIT, социальная поддержка – MSPSS, QALYs (EQ-5D), заявленная недееспособность – WHO-DAS-II. Кроме того, собирались данные о возможных сложностях, с которыми потерпевшие могли столкнуться после выхода на работу.

**Результаты:** В исследовании приняли участие 382 человека. Средний возраст испытуемых составил 48.6 лет, 65% из них имели незначительные травмы (степень тяжести травмы = 1-3).

**Выводы:** В рамках данного исследования впервые были изучены пострадавшие с незначительными травмами и травмами средней тяжести. Дальнейшие публикации представят более детальные данные по проблеме, рассматривая пострадавших в ДТП через 2 года после трагедии.

**Ключевые слова:** посттравматический стресс, дорожно-транспортное происшествие, лонгитюдное исследование, физическое выздоровление, незначительные травмы

Name of translator: Marina Shcherbak

Citation: European Journal of Psychotraumatology 2014, 5: 22612 - <http://dx.doi.org/10.3402/ejpt.v5.22612>
