# Supplementary material
Source: publisher figshare collection journal article supplement (https://tandf.figshare.com/articles/dataset/_/21829557)
Supplement: Supplementary file 2 [file 1]

## **A Queenslandi Egyetem kutatása közúti balesetet elszenvedők fizikai és pszichológiai állapotára vonatkozóan (UQ SuPPORT): Elrendezés és módszerek**

Justin Alistair Kenardy

### **Abstract**

Háttér: Ez idáig a mentális egészség hatását a közúti baleseteket követő fizikai felépülésre kohort vizsgálatokban kutatták, súlyos sérülteken. A UQ SuPPORT kutatás a fizikai és pszichológiai következményét vizsgálja közúti balesetek könnyebb sérültjeinek a queenslandi jogi rendszer Compulsory Insurance Scheme-ben.

Célkitűzések: A cikk leírja a vizsgálat kutatási protokollját további publikációk segítésére

Módszer: A két éves longitudinális vizsgálatban interjúk és kérdőívek segítségével vették fel közúti balesetek elszenvedőit 6, 12 és 24 hónappal az után. A telefonos interjúban a következő mérőeszközöket használták: DSM-IV CIDI – PTSD, GAD, MDE, pánik, agorafóbia; önbeszámoló rokkantság (WHO-DAS-II), életminőség (SFv2), alkohol használat (AUDIT), társas támogatás (MSPSS), QALYs (EQ-5D); a munkába állással kapcsolatos adatokat postai úton kérték be.

Eredmények: Összesen 382 sérült járult hozzá a kutatásban való részvételhez a kutatás elején, őket keresték fel mindegyik időpontban. A válaszmegtagadás magas volt (65%). Az átlag életkor az első hullámban 48,6 év, a minta 65%-a könnyű sérülést szenvedett el (Injury Severity Score = 1-3).

Következtetések: Ez a vizsgálat egy egyedi populáció adatait gyűjtötte össze, közúti balesetek könnyebb sérültjeit. A tervezett tanulmányok részletesebb betekintést nyújtanak majd a felvett mérőeszközök és a felépülés kapcsolatára, közúti balesetek után 2 évvel.

**Keywords:** poszttraumás stressz, közúti baleset, longitudinális, fizikai felépülés, kisebb sérülés

Name of translator: Kinga Fodor

Citation: European Journal of Psychotraumatology 2014, 5: 22612 - <http://dx.doi.org/10.3402/ejpt.v5.22612>
