# Supplementary material
Source: publisher figshare collection journal article supplement (https://tandf.figshare.com/articles/dataset/_/21829557)
Supplement: Supplementary file 3 [file 1]

## **Studija Univerziteta u Kvinslendu o fizičkom i psihološkom ishodu potražilaca sa blagim i umerenim povredama nakon saobraćajnih nesreća (UQ SuPPORT): dizajn i metod**

Justin Alistair Kenardy

Uvod: Istraživanja koja su, do sada, ispitivala kako mentalno zdravlje utiče na fizički oporavak nakon saobraćajne nesreće, uglavnom su bila fokusirana na kohorte ispitanika sa teškim povredama. UQ SuPPORT studija proučava fizički i psihološki ishod potraživača sa blagim (minor) povredama u saobraćajnim nesrećama po shemi obaveznog osiguranja.

Cilj: Ovaj rad izdvaja protokole ove studije kao platformu za buduće publikacije.

Metod: dvogodišnja longitudinalna kohortna studija u kojoj su prikupljeni podaci i nalazi pregleda od potraživača 6, 12 i 24 meseci nakon učešća u saobraćajnim udesima. Instrumenti koji su korišteni tokom telefonskog intervjuja su DSM-IV CIDI for PTSD, GAP, MDE, panične napade, agoraphobiju i samoprocena onesposobljenosti (WHO-DAS-II). Putem upitnika poslatih poštom procenjavani su ishodi za kvalitet života (SF-36v2), upotrebu alkohola (AUDIT), socijalnu podršku (MSPSS), QALYs (EQ-5D) i povratak na posao.

Rezultati: Ukupno 382 potražioca su dali saglasnost da učestvuju u početku studije i procenjavani su u predviđenim vremenima. Ostanak u studiji je bio visok (65%). Prosečan uzrast učesnika u prvom merenju je bio 48.6 godina, sa 65% uzorka koji je imao blage povrede (Skor težine povrede = 1-3).

Zaključak: Ova studija je prikupila jedinstven uzorak podataka da bi procenjivali obrazac oporavka potražitelja sa blagim povredama. Buduće publikacije će kompletnije procenjivati efekte prikupljenih podataka na stopu oporavka 2 godine nakon učešća u saobraćajnoj nesreći.

Keywords: posttraumatski stres, saobraćajna nesreća, longitudinalna, fizički oporavak, blage povrede.

Name of translator: Maja Milosavljevic

Citation: European Journal of Psychotraumatology 2014, 5: 22612 - <http://dx.doi.org/10.3402/ejpt.v5.22612>
