# Supplementary material
Source: publisher figshare collection journal article supplement (https://tandf.figshare.com/articles/dataset/_/21829557)
Supplement: Supplementary file 4 [file 1]

## **Eine Studie der Universität von Queensland zu körperlichen und psychologischen Folgen bei Geschädigten mit leichten und mittelgradigen Verletzungen nach einem Verkehrsunfall (UQ SuPPORT): Design und Methoden**

Justin Alistair Kenardy

**Hintergrund.** Bisher konzentrierte sich die Forschung zum Einfluss der psychischen Gesundheit auf die körperliche Genesung nach einem Straßenverkehrsunfall auf Kohorten mit schweren Verletzungen. Die UQ SuPPORT Studie soll die körperlichen und psychischen Folgen für Geschädigte mit leichten Verletzungen nach einem Straßenverkehrsunfall gemäß dem Common Law Pflichtversicherungssystem von Queensland untersuchen.

**Ziele.** Dieser Artikel stellt die Protokolle dieser Studie als Basis für zukünftige Publikationen vor.

**Methoden.** Die über zwei Jahre laufende Kohorten-Längsschnittstudie sammelte Interviews und Umfragedaten von Geschädigten sechs, zwölf und 24 Monate nach dem RTC. Die Messinstrumente, die in den Telefoninterviews verwendet wurden, umfassten das DSM-CIDI für PTBS, GAD, MDE, Panikattacken, Agoraphobie und selbstberichtete Invalidität (WHO-DAS-II), Lebensqualität (SF-36v2), Alkoholkonsum (AUDIT), soziale Unterstützung (MSPSS), QALYs (EQ-5D) und die Folgen einer Rückkehr zur Arbeit wurden mittels postalischer Fragebögen erfasst.

**Ergebnisse:** Insgesamt stimmten 382 Geschädigte einer Teilnahme an der Studie zu. Diese Teilnehmer wurden bei jeder Befragungswelle kontaktiert. Der Rücklauf war hoch (65%). Das durchschnittliche Alter der Teilnehmer bei der ersten Befragungswelle war 48,6 Jahre, wobei 65% der Stichprobe leichte Verletzungen erlitten hatten (Schweregrad der Verletzung = 1-3).

**Schlussfolgerungen.** In dieser Studie wurden anhand einer spezifischen Stichprobe Daten gesammelt, um den Verlauf der Genesung bei Geschädigten mit leichten Verletzungen zu untersuchen. Zukünftige Publikationen werden anhand der gesammelten Messdaten die Auswirkungen auf die Genesungsraten 2 Jahre nach dem RTC genauer erfassen.

**Keyword/Schlagwörter:** posttraumatischer Stress, PKW-Verkehrsunfall, Längsschnitt, körperliche Genesung, leichte Verletzungen.

**Name of translator:** Natalia Losew, Elisabeth Probst

**Citation:** European Journal of Psychotraumatology 2014, 5: 22612 - <http://dx.doi.org/10.3402/ejpt.v5.22612>
