# Supplementary material
Source: publisher figshare collection journal article supplement (https://tandf.figshare.com/articles/dataset/_/21829557)
Supplement: Supplementary file 5 [file 1]

## **Bir Yol Trafik kazası sonrasında hafif ve orta dereceli yaralanması olan tazminat hakkı sahipleri için Queensland Üniversitesi Fiziksel ve Psikolojik Sonuç Çalışması (UQ SuPPORT): Desen ve yöntemler**

Justin Alistair Kenardy

### **Özet**

**Arkaplan:** Günümüze dek ruh sağlığının bir yol trafik kazası (YTK) sonrasında fiziksel iyileşmeyi nasıl etkilediğini inceleyen araştırmalar şiddetli yaralanması olan kohortlara odaklanmıştır. UQ SUPPORT çalışması Queensland yasalarının Zorunlu Sigorta Planı kapsamında bir yol trafik kazası sonrasında hafif yaralanmaları olan tazminat hakkı sahiplerinin fiziksel ve psikolojik durumunu çalışmayı hedeflemektedir.

**Amaç:** Bu makale gelecek yayınlar için platform olarak bu çalışmanın protokollerinin bir taslağını sunmaktadır.

**Yöntemler:** 2-yıllık boylamasına kohort çalışmasında YTK sonrasındaki 6., 12. ve 24. aylarda tazminat hakkı sahiplerinden görüşme ve anket verisi toplanmıştır. Telefon görüşmesinde kullanılan ölçümler TSSB, Yaygın anksiyete bozukluğu, Majör depresif epizod, Panik ataklar, Agorafobi için DSM-IV CIDI ve öz-bildirime dayalı maluliyet durumu (WHO-DAS-II) içermiştir. Yaşam kalitesi (SF-36v2), alkol kullanımı (AUDIT), sosyal destek (MSPSS), yaşam kalitesine göre düzenlenmiş yaşam yılı (EQ-5D) ve işe dönüşün sonucu postayla gönderilen anketler yoluyla değerlendirilmiştir.

**Sonuçlar:** Toplam 382 tazminat hakkı sahibi çalışma başında çalışmaya katılmayı onaylamışlardır ve bu katılımcılar ile her dalgada iletişime geçilmiştir. Çalışmaya devam etme oranı yüksekti (%65). Örneklemin %65'inin hafif yaralanmalarının olduğu (Yaralanma Şiddeti Puanı = 1-3) 1. Dalgada katılımcıların ortalama yaşı 48.6'ydı.

**Tartışma:** Bu çalışma hafif yaralanmaları olan tazminat hakkı sahiplerinin iyileşme örüntülerini incelemek için özgün bir veri örneklemini toplamıştır. Gelecekteki yayınlar alınan ölçümlerin yol trafik kazalarından 2 yıl sonra iyileşme oranları üzerindeki etkilerini tam olarak inceleyecektir.

**Anahtar kelimeler:** travma sonrası stres, motorlu araç kazası, boylamasına, fiziksel iyileşme, hafif yaralanmalar

Name of translator: Gözde İkizer

Citation: European Journal of Psychotraumatology 2014, 5: 22612 -<http://dx.doi.org/10.3402/ejpt.v5.22612>
