# Supplementary material
Source: publisher figshare collection journal article supplement (https://tandf.figshare.com/articles/dataset/_/21829557)
Supplement: Supplementary file 6 [file 1]

**Studija Univerziteta u Queensland-u (The University of Queensland) o fizičkom i psihološkom ishodu tužilaca sa blagim i umjerenim povredama nakon saobraćajnih nesreća(UQ SuPPORT): dizajn i metoda**

Justin Alistair Kenardy

Uvod: Istraživanja koja su do sada ispitivala kako mentalno zdravlje utiče na fizički oporavak nakon saobraćajne nesreće, uglavnom su bila fokusirana na kohorte sa teškim povredama. UQ SuPPORT studija proučava fizički i psihološki uticaj blagih povreda u saobraćajnim nesrećama potraživača osiguranim na šemi obaveznog osiguranja u Queensland-u, Australija.

Cilj: Ovaj rad izdvaja protokole ove studije kao platformu za buduće publikacije.

Metod: dvogodišnja longitudinalna kohortna studija u kojoj su prikupljeni podaci i nalazi pregleda od potraživača 6, 12 i 24 mjeseca nakon učešća u saobraćajnim udesima. Instrumenti koji su korišteni tokom telefonskog intervju su DSM-IV CIDI za PTSP, GAP, MDE, panične napade, agoraphobiju; i samoprocijenjenje onesposobnosti (WHO-DAS-II). Putem upitnika poslanih poštom procenjavani su uticaji na kvalitet života (SF-36v2), upotrebu alkohola (AUDIT), socijalnu podršku (MSPSS), QALYs (EQ-5D) i povratak na posao.

Rezultati: Ukupno 382 potražioca su dali saglasnost da učestvuju u početku studije i procenjavani su u predviđenim vremenima. Ostanak u studiji je bio visok (65%). Prosječan uzrast učesnika u prvom merenju je bio 48.6 godina, sa 65% onih koji su imali blage povrede (Stepen povrede = 1-3).

Zaključak: Ova studija je prikupila jedinstven uzorak podataka da bi procenjivali obrazac oporavka potražitelja sa blagim povredama. Buduće publikacije će kompletnije procijeniti efekte prikupljenih podataka na stepen oporavka 2 godine nakon učešća u saobraćajnoj nesreći.

Keywords: posttraumatski stres, saobraćajna nesreća, longitudinalna, fizički oporavak, blage povrede.

Name of translator: Dzenana Kartal

Citation: European Journal of Psychotraumatology 2014, 5: 22612 - <http://dx.doi.org/10.3402/ejpt.v5.22612>
