# Supplementary material
Source: publisher figshare collection journal article supplement (https://tandf.figshare.com/articles/dataset/_/21829557)
Supplement: Supplementary file 7 [file 1]

**Title: 昆士兰大学对一起道路交通事故(UQ SuPPORT)轻度到中度受伤索赔者的研究：设计与方法**

**Authors:** Justin Kenardy, Michelle Heron-Delaney, Nicholas Bellamy, Michele Sterling, Luke Connelly

**Abstract**

背景：道路交通事故（RTC）方面的队列研究多集中在重伤员的精神健康对躯体康复的影响。UQ SuPPORT 研究是在一起道路交通事故发生后，依据昆士兰普通法律强制保险计划对遭受轻度-中度受伤索赔者的躯体和心理结局进行研究。

目的：本文作为一个平台列出了研究计划，为将来结果发表做准备。

方法：这是一个为期 2 年的队列研究，计划对索赔者在 RTC 后 6 个月、12 个月、24 个月进行访谈和调查。评估主要采用电话访谈，内容包括依据 DSM-IV 标准的简短国际诊断访谈，用于评估创伤后应激障碍、广泛性焦虑障碍、重性抑郁发作、惊恐发作、广场恐怖，以及自我报告的残疾(WHO-DAS-II)。通过邮寄的问卷调查了生活质量(SF-36v2), 酒精使用 (AUDIT), 社会支持 (MSPSS), 残疾调整生命年(EQ-5D)，以及回去工作之后的情况。

结果：有 382 位索赔者同意参加初次调查，以后每次都对这些进行了调查。保持率是高的（65%）。初次调查时平均年龄 48.6 岁，65%的人处于持续轻伤（伤害严重程度评分为 1-3）。

结论：本研究特别收集了轻度受伤索赔者的康复模式方面的数据。将来出版的结果将了解各项评估指标对 RTC2 年之后康复率的影响。

**Keywords:** 创伤后应激、机动车事故、纵向研究、躯体康复、轻伤

**Name of translator:** Zhonglin Tan

**Citation:** European Journal of Psychotraumatology 2014, 5: 22612 - <http://dx.doi.org/10.3402/ejpt.v5.22612>
