# Supplementary material
Source: publisher figshare collection journal article supplement (https://tandf.figshare.com/articles/dataset/_/21829557)
Supplement: Supplementary file 8 [file 1]

Justin Alistair Kenardy

Badanie Uniwersytetu w Queensland dotyczące fizycznych i psychologicznych konsekwencji wypadków drogowych dla świadczeniobiorców z niewielkimi i umiarkowanymi obrażeniami (UQ SuPPORT): schemat i metody badawcze.

Wprowadzenie: Dotychczasowe badania dotyczące tego, jak zdrowie psychiczne wpływa na wyzdrowienie fizyczne ofiar wypadków drogowych skupione były na poważnych wypadkach. Projekt badawczy UQ SuPPORT skupia się na fizycznych i psychologicznych konsekwencjach wypadków drogowych dla świadczeniobiorców z niewielkimi urazami, którzy pobierali świadczenia Compulsory Insurance Scheme w Queensland.

Cel: Celem tej pracy jest prezentacja protokołu z niniejszego badania jako platformy dla przyszłych publikacji.

Metoda: Przeprowadzono 2 letnie, podłużne badanie kohortowe złożone z ankiet i wywiadów przeprowadzonych wśród świadczeniobiorców, którzy doznali wypadku 6, 12 i 24 miesiące temu. Wykorzystano takie narzędzia, jak DSM-IV i CIDI do pomiaru PTSD, GAD i MDE do pomiaru ataków paniki oraz agorafobii oraz WHO-DAS-II do pomiaru samooceny stopnia niepełnosprawności. Badano również jakość życia (SF-36v2), spożycie alkoholu (AUDIT), wsparcie społeczne (MSPSS) oraz wskaźnik powrotu do pracy QALYs (EQ-5D).

Wyniki: Zbadano próbę 382 świadczeniobiorców w schemacie badań podłużnych, którzy uczestniczyli w różnych fazach badania. Wskaźnik retencji był wysoki (65%). Średni wiek badanych w czasie pierwszej fazy badania wyniósł 48,6 lat, przy czym 65% respondentów doznało niewielkich obrażeń (wskaźnik wielkości obrażeń wahał się między 1-3).

Konkluzje: Badanie to dostarczyło unikalnych danych dotyczących wzorców zdrowienia z wypadków drogowych wśród świadczeniobiorców z niewielkimi urazami. Przyszłe prace na ten temat powinny skupić się w większym stopniu na wyżej wspomnianych zagadnieniach 2 lata po doświadczeniu wypadku drogowego.

Słowa kluczowe: stres potraumatyczny; wypadek samochodowy; podłużny; wyzdrowienie fizyczne; niewielkie obrażenia

Name of translator: Marcin Rzeszutek, University of Finance and Management in Warsaw, Poland.

Citation: European Journal of Psychotraumatology 2014, 5: 22612 -<http://dx.doi.org/10.3402/ejpt.v5.22612>
