# Supplementary material
Source: publisher figshare collection journal article supplement (https://tandf.figshare.com/articles/dataset/_/21829557)
Supplement: Supplementary file 9 [file 1]

# **Estudio de resultados físicos y psicológicos de la Universidad de Queensland para los demandantes con lesiones leves y moderadas después de un accidente de tráfico (UQ SuPPORT): Diseño y métodos**

Justin Alistair Kenardy

## **Abstract**

**Antecedentes.** Hasta la fecha, los estudios que investigan cómo la salud mental impacta la recuperación física después de un accidente de tráfico se han centrado en sujetos con heridas graves. El estudio UQ SuPPORT tiene como objetivo estudiar los efectos físicos y psicológicos de los demandantes con heridas leves tras un accidente de tráfico en el marco del régimen de seguro obligatorio de derecho común de Queensland.

**Objetivos.** Este artículo esboza los protocolos de este estudio como plataforma para futuras publicaciones.

**Métodos.** El estudio longitudinal de cohorte de 2 años recoge datos de entrevistas y encuestas de los demandantes a los 6, 12 y 24 meses después del accidente de tráfico. Las medidas utilizadas en la entrevista telefónica incluyeron el DSM-IV CIDI para el TEPT, GAD, MDE, ataques de pánico, agorafobia y la incapacidad autoreferida (WHO- DAS- II). Los resultados de la calidad de vida (SF- 36v2), el consumo de alcohol (AUDIT), el apoyo social (MSPSS), QALYs (EQ- 5D) y la vuelta al trabajo fueron evaluados a través de cuestionarios enviados por correo.

**Resultados.** Un total de 382 demandantes dieron su consentimiento a participar en el inicio del estudio y estos participantes fueron entrevistados en cada uno de los puntos. La retención fue alta (65%). La edad promedio de los participantes en el primer punto fue de 48,6 años y el 65% de la muestra había sufrido heridas menores (Puntuación de Gravedad de las Lesiones = 1-3).

**Conclusiones.** Este estudio ha recogido una muestra única de datos para investigar los patrones de recuperación de los demandantes con lesiones menores. En futuras publicaciones se evaluarán más a fondo los efectos de las medidas recogidas en los índices de recuperación 2 años después del accidente de tráfico.

**Keywords:** estrés postraumático, accidente de tráfico, longitudinales, recuperación física, lesiones menores.

**Name of translator:** Miriam Ramos Morrison

**Citation:** European Journal of Psychotraumatology 2014, 5: 22612 - <http://dx.doi.org/10.3402/ejpt.v5.22612>
